# Supplementary material
Source: PubMed Central journal article supplement (PMC8459670)

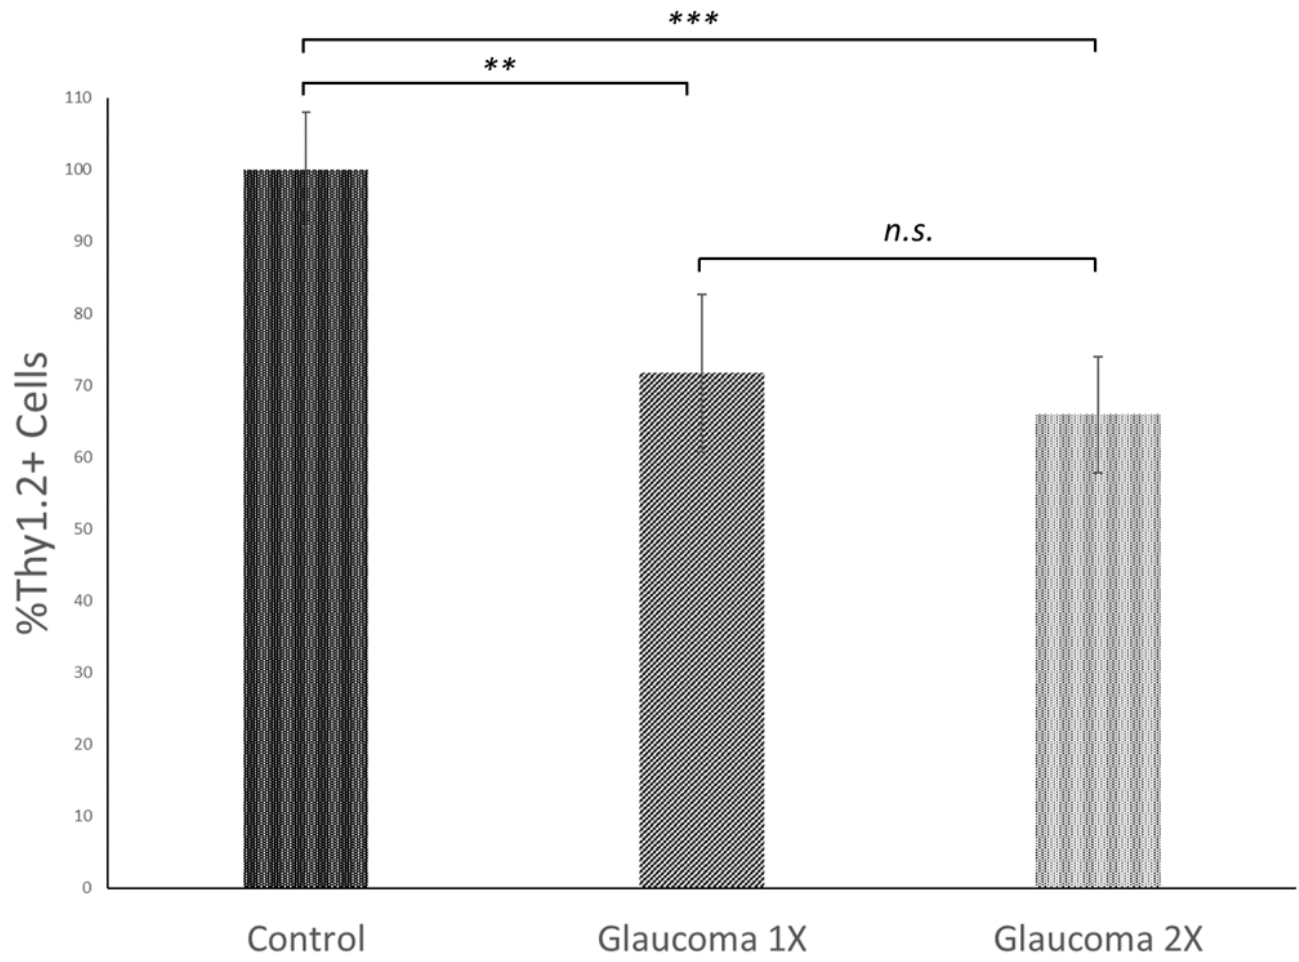

Supplement: NIHMS1730731-supplement-3.pdf [file NIHMS1730731-supplement-3.pdf]

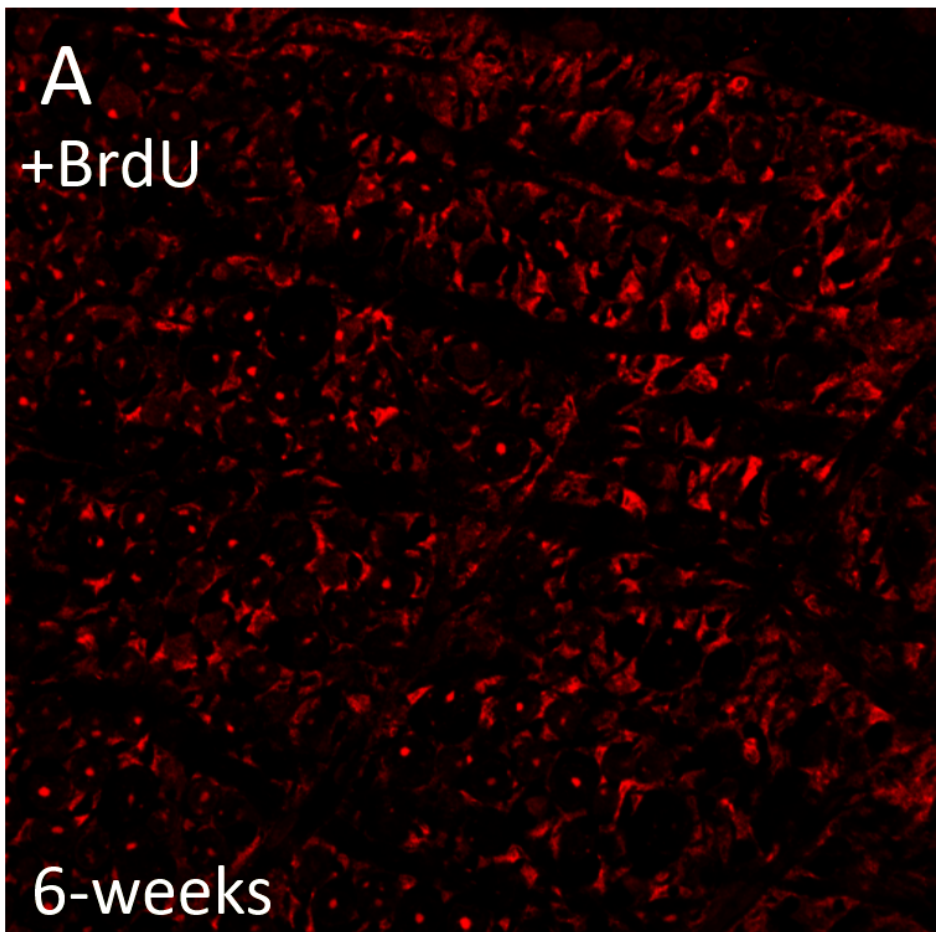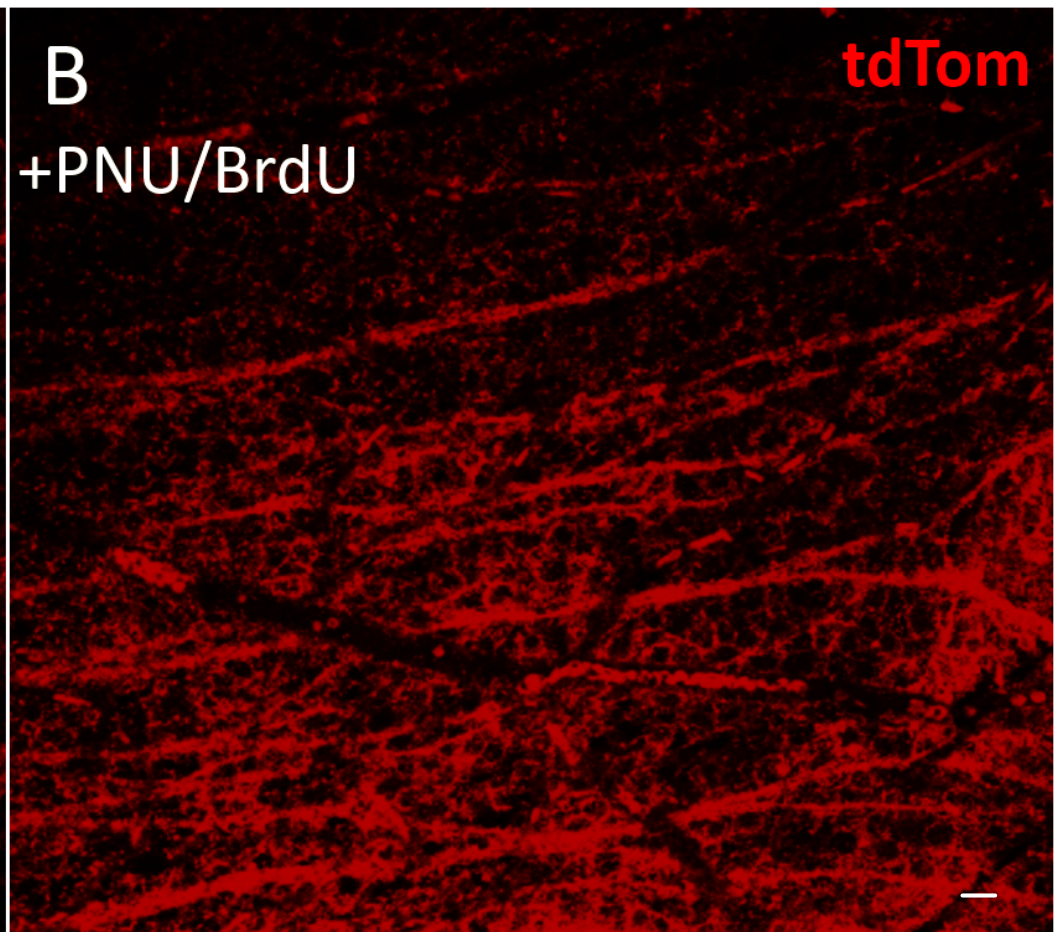

Supplement: NIHMS1730731-supplement-4.pdf [file NIHMS1730731-supplement-4.pdf]
